# Supplementary material for: Increased CX3CL1 mRNA expression level is a positive prognostic factor in patients with lung adenocarcinoma
Source: PubMed Central journal article supplement — Oncol Lett. 2019 Apr 3;17(6):4877–90. doi: 10.3892/ol.2019.10211 (PMC6507390; doi:10.3892/ol.2019.10211), 2019-04-03
Supplement: Supplementary_Data.pdf [file Supplementary_Data.pdf]

Table SI. Correlation between CX3CL1 expression and other genes in lung adenocarcinoma.

| Gene symbol | Pearson correlation coefficient (r) |          |          |          |          |          |          | No. of datasets with $r>0.4$ |
|-------------|-------------------------------------|----------|----------|----------|----------|----------|----------|------------------------------|
|             | TCGA                                | GSE14814 | GSE30219 | GSE37745 | GSE42127 | GSE50081 | GSE68465 |                              |
| CX3CL1      | 1                                   | 1        | 1        | 1        | 1        | 1        | 1        | 7                            |
| CCL22       | 0.455                               | 0.405    | 0.447    | 0.375    | 0.417    | 0.403    | 0.434    | 6                            |
| IL27RA      | 0.522                               | 0.413    | 0.516    | 0.56     | 0.34     | 0.401    | 0.372    | 5                            |
| SLC34A2     | 0.483                               | 0.409    | 0.428    | 0.576    | 0.428    | 0.321    | 0.337    | 5                            |
| AQP1        | 0.495                               | 0.356    | 0.433    | 0.457    | 0.429    | 0.438    | 0.231    | 5                            |
| CAMK1       | 0.452                               | 0.401    | 0.408    | 0.468    | 0.302    | 0.427    | 0.221    | 5                            |
| ICAM1       | 0.547                               | 0.516    | 0.59     | 0.525    | 0.128    | 0.384    | 0.432    | 5                            |
| TIPARP      | 0.403                               | 0.39     | 0.562    | 0.521    | 0.548    | 0.291    | 0.512    | 5                            |
| CD1C        | 0.544                               | 0.515    | 0.295    | 0.438    | 0.539    | 0.439    | 0.295    | 5                            |
| CFLAR       | 0.421                               | 0.462    | 0.54     | 0.489    | 0.486    | 0.253    | 0.259    | 5                            |
| CST6        | 0.517                               | 0.466    | 0.497    | 0.626    | 0.021    | 0.466    | 0.278    | 5                            |
| IFT57       | 0.459                               | 0.42     | 0.429    | 0.448    | 0.416    | 0.122    | 0.219    | 5                            |
| RRAD        | 0.544                               | 0.299    | 0.523    | 0.456    | 0.587    | 0.477    | 0.163    | 5                            |
| SAMD4A      | 0.491                               | 0.413    | 0.563    | 0.54     | 0.284    | 0.418    | 0.289    | 5                            |
| DPP4        | 0.553                               | 0.441    | 0.572    | 0.505    | 0.388    | 0.309    | 0.383    | 4                            |
| SPRED2      | 0.434                               | 0.337    | 0.401    | 0.446    | 0.472    | 0.375    | 0.371    | 4                            |
| CD1A        | 0.524                               | 0.34     | 0.421    | 0.445    | 0.494    | 0.374    | 0.245    | 4                            |
| CDC42EP1    | 0.551                               | 0.289    | 0.505    | 0.512    | 0.394    | 0.504    | 0.365    | 4                            |
| FHOD1       | 0.431                               | 0.319    | 0.53     | 0.528    | 0.322    | 0.458    | 0.248    | 4                            |
| HLA-DPB1    | 0.472                               | 0.341    | 0.416    | 0.502    | 0.456    | 0.365    | 0.173    | 4                            |
| HLA-DQB2    | 0.553                               | 0.334    | 0.405    | 0.444    | 0.514    | 0.32     | 0.204    | 4                            |
| ITGA2       | 0.465                               | 0.355    | 0.528    | 0.525    | 0.497    | 0.311    | 0.285    | 4                            |
| MGLL        | 0.493                               | 0.346    | 0.428    | 0.43     | 0.532    | 0.304    | 0.269    | 4                            |
| PLEKHM1     | 0.447                               | 0.34     | 0.566    | 0.441    | 0.359    | 0.409    | 0.224    | 4                            |
| PLS3        | 0.487                               | 0.353    | 0.586    | 0.669    | 0.282    | 0.321    | 0.483    | 4                            |
| ANXA1       | 0.438                               | 0.138    | 0.625    | 0.685    | 0.504    | 0.144    | 0.357    | 4                            |
| CDH3        | 0.417                               | 0.402    | 0.437    | 0.544    | 0.286    | 0.281    | 0.326    | 4                            |
| COL4A3      | 0.351                               | 0.411    | 0.465    | 0.414    | 0.531    | 0.118    | 0.241    | 4                            |
| DUSP6       | 0.536                               | 0.268    | 0.496    | 0.524    | 0.5      | 0.354    | 0.282    | 4                            |
| ESYT1       | 0.326                               | 0.508    | 0.486    | 0.5      | -        | 0.421    | 0.25     | 4                            |
| GALNT10     | 0.516                               | 0.276    | 0.5      | 0.604    | -0.029   | 0.489    | 0.326    | 4                            |
| GLS         | 0.406                               | 0.404    | 0.344    | 0.49     | 0.448    | 0.133    | 0.16     | 4                            |
| HPGDS       | 0.553                               | 0.403    | 0.507    | 0.529    | -        | 0.394    | 0.288    | 4                            |
| ITGB2       | 0.482                               | 0.404    | 0.354    | 0.487    | 0.412    | 0.27     | 0.243    | 4                            |
| MSN         | 0.466                               | 0.232    | 0.513    | 0.48     | 0.353    | 0.407    | 0.281    | 4                            |
| SPRY2       | 0.457                               | 0.223    | 0.433    | 0.571    | 0.433    | 0.242    | 0.359    | 4                            |
| STAC        | 0.489                               | 0.358    | 0.527    | 0.416    | 0.203    | 0.486    | 0.248    | 4                            |
| SYNPO       | 0.454                               | 0.317    | 0.505    | 0.498    | -0.052   | 0.416    | 0.194    | 4                            |
| TK2         | 0.541                               | 0.301    | 0.472    | 0.476    | 0.291    | 0.421    | 0.197    | 4                            |
| TMEM173     | 0.579                               | -        | 0.369    | 0.54     | 0.548    | 0.497    | -        | 4                            |
| TNC         | 0.478                               | 0.231    | 0.463    | 0.624    | 0.45     | 0.394    | 0.274    | 4                            |
| TNIK        | 0.492                               | 0.456    | 0.414    | 0.428    | 0.304    | 0.287    | 0.298    | 4                            |
| ZNF462      | 0.49                                | -        | 0.569    | 0.362    | 0.543    | 0.423    | -        | 4                            |
| ARHGAP31    | 0.444                               | -        | 0.534    | 0.478    | -        | 0.484    | -        | 4                            |
| FCGBP       | 0.547                               | 0.262    | 0.47     | 0.517    | 0.082    | 0.425    | 0.144    | 4                            |
| FLNA        | 0.496                               | 0.102    | 0.534    | 0.598    | 0.171    | 0.544    | 0.275    | 4                            |
| MEGF6       | 0.44                                | 0.225    | 0.432    | 0.422    | -        | 0.428    | 0.166    | 4                            |
| TMEM43      | 0.492                               | 0.286    | 0.565    | 0.549    | 0.491    | 0.289    | 0.239    | 4                            |
| CDC42EP3    | 0.487                               | 0.374    | 0.619    | 0.561    | 0.325    | 0.359    | 0.322    | 3                            |
| CD207       | 0.539                               | 0.343    | 0.331    | 0.427    | 0.495    | 0.374    | 0.258    | 3                            |
| CD83        | 0.478                               | 0.391    | 0.34     | 0.422    | 0.462    | 0.329    | 0.293    | 3                            |
| FGFBP1      | 0.378                               | 0.485    | 0.426    | 0.48     | 0.247    | 0.329    | 0.37     | 3                            |
| HLA-DMA     | 0.435                               | 0.397    | 0.359    | 0.466    | 0.457    | 0.343    | 0.185    | 3                            |
| HLF         | 0.495                               | 0.348    | 0.37     | 0.486    | 0.408    | 0.306    | 0.257    | 3                            |

Table SI. Continued.

| Gene symbol | Pearson correlation coefficient (r) |          |          |          |          |          |          | No. of datasets with $r > 0.4$ |
|-------------|-------------------------------------|----------|----------|----------|----------|----------|----------|--------------------------------|
|             | TCGA                                | GSE14814 | GSE30219 | GSE37745 | GSE42127 | GSE50081 | GSE68465 |                                |
| IDS         | 0.541                               | 0.339    | 0.572    | 0.522    | 0.368    | 0.348    | 0.286    | 3                              |
| KCNK5       | 0.526                               | 0.314    | 0.437    | 0.421    | 0.395    | 0.33     | 0.29     | 3                              |
| LDOC1       | 0.365                               | 0.436    | 0.509    | 0.488    | 0.309    | 0.274    | 0.325    | 3                              |
| MMP28       | 0.407                               | 0.369    | 0.493    | 0.571    | 0.357    | 0.305    | 0.239    | 3                              |
| MVP         | 0.405                               | 0.38     | 0.388    | 0.633    | 0.406    | 0.366    | 0.197    | 3                              |
| RAB38       | 0.425                               | 0.324    | 0.361    | 0.653    | 0.246    | 0.336    | 0.477    | 3                              |
| AHNAK       | 0.323                               | 0.068    | 0.426    | 0.436    | 0.462    | 0.371    | 0.243    | 3                              |
| AMIGO2      | 0.456                               | 0.314    | 0.47     | 0.398    | -0.123   | 0.285    | 0.436    | 3                              |
| ATP13A4     | 0.502                               | -        | 0.554    | 0.445    | 0.343    | 0.309    | -        | 3                              |
| BEAN1       | -                                   | 0.423    | 0.566    | 0.6      | -        | 0.307    | 0.375    | 3                              |
| C1orf116    | 0.457                               | 0.392    | 0.422    | 0.459    | 0.397    | 0.213    | 0.22     | 3                              |
| CD97        | 0.359                               | 0.305    | 0.457    | 0.495    | 0.429    | 0.281    | 0.12     | 3                              |
| CPNE2       | 0.505                               | -        | 0.481    | 0.527    | 0.324    | 0.354    | -        | 3                              |
| CYR61       | 0.388                               | 0.035    | 0.437    | 0.546    | 0.428    | 0.223    | 0.31     | 3                              |
| DCUN1D3     | 0.326                               | -        | 0.432    | 0.638    | 0.333    | 0.444    | -        | 3                              |
| FOXQ1       | 0.406                               | -        | 0.394    | 0.509    | 0.473    | 0.392    | -        | 3                              |
| IFI44L      | 0.407                               | 0.33     | 0.361    | 0.47     | 0.468    | 0.214    | 0.118    | 3                              |
| MAPKAPK3    | 0.437                               | 0.355    | 0.362    | 0.499    | 0.452    | 0.276    | 0.138    | 3                              |
| MET         | -                                   | 0.428    | 0.555    | 0.652    | 0.308    | 0.283    | 0.334    | 3                              |
| MYO1G       | 0.522                               | -        | 0.415    | 0.426    | 0.369    | 0.324    | -        | 3                              |
| NAPSA       | 0.434                               | -        | 0.451    | 0.468    | 0.4      | 0.318    | -        | 3                              |
| PLAT        | 0.414                               | 0.022    | 0.439    | 0.465    | 0.351    | 0.378    | 0.066    | 3                              |
| PTPN13      | 0.463                               | 0.313    | 0.459    | 0.446    | 0.387    | 0.088    | 0.211    | 3                              |
| RGS3        | 0.498                               | 0.293    | 0.459    | 0.509    | 0.081    | 0.385    | 0.375    | 3                              |
| SDC4        | 0.416                               | 0.253    | 0.556    | 0.522    | 0.381    | 0.361    | 0.285    | 3                              |
| SH3RF2      | 0.431                               | -        | 0.364    | 0.468    | 0.479    | 0.347    | -        | 3                              |
| SLC15A3     | 0.412                               | 0.363    | 0.337    | 0.45     | 0.453    | 0.28     | 0.17     | 3                              |
| SLC1A7      | 0.514                               | 0.346    | 0.458    | 0.24     | 0.442    | 0.356    | 0.221    | 3                              |
| STK17A      | 0.496                               | 0.362    | 0.449    | 0.564    | 0.112    | 0.219    | 0.302    | 3                              |
| VAV1        | 0.404                               | 0.396    | 0.469    | 0.473    | 0.282    | 0.392    | 0.268    | 3                              |
| AIM1        | 0.514                               | 0.366    | 0.546    | 0.614    | 0.078    | 0.296    | 0.262    | 3                              |
| ANK3        | 0.438                               | 0.459    | 0.384    | 0.509    | 0.052    | 0.175    | 0.278    | 3                              |
| APLP2       | 0.436                               | 0.243    | 0.424    | 0.594    | 0.267    | 0.289    | 0.317    | 3                              |
| ARHGEF3     | 0.324                               | 0.143    | 0.454    | 0.412    | 0.442    | 0.044    | 0.128    | 3                              |
| ARL6IP5     | 0.418                               | 0.152    | 0.55     | 0.434    | 0.29     | 0.219    | 0.323    | 3                              |
| CH25H       | 0.465                               | 0.055    | 0.191    | 0.505    | 0.428    | 0.369    | 0.168    | 3                              |
| EDNRA       | 0.434                               | 0.111    | 0.512    | 0.483    | 0.272    | 0.33     | 0.116    | 3                              |
| FAS         | 0.487                               | 0.271    | 0.508    | 0.582    | 0.317    | 0.193    | 0.201    | 3                              |
| GNAI2       | 0.515                               | 0.185    | 0.522    | 0.451    | 0.374    | 0.288    | 0.237    | 3                              |
| GPR116      | 0.454                               | 0.241    | 0.39     | 0.519    | 0.476    | 0.214    | 0.241    | 3                              |
| GRAMD3      | 0.488                               | 0.245    | 0.415    | 0.45     | 0.359    | 0.121    | 0.3      | 3                              |
| HLA-DQB1    | -                                   | 0.42     | 0.441    | 0.505    | -        | 0.346    | 0.221    | 3                              |
| ITGA3       | 0.471                               | 0.265    | 0.385    | 0.56     | 0.171    | 0.494    | 0.296    | 3                              |
| ITGAM       | 0.43                                | 0.425    | 0.402    | 0.384    | 0.259    | 0.263    | 0.181    | 3                              |
| LY86        | 0.402                               | 0.329    | 0.295    | 0.432    | 0.403    | 0.276    | 0.206    | 3                              |
| MAMLD1      | 0.368                               | 0.111    | 0.589    | 0.468    | -        | 0.46     | 0.196    | 3                              |
| MYD88       | 0.435                               | 0.284    | 0.552    | 0.411    | 0.27     | 0.346    | 0.262    | 3                              |
| NAPSB       | 0.53                                | -        | 0.434    | 0.516    | 0.236    | 0.331    | -        | 3                              |
| PAG1        | 0.5                                 | -        | 0.509    | 0.451    | 0.375    | 0.126    | -        | 3                              |
| PARP3       | 0.476                               | 0.298    | 0.471    | 0.477    | 0.167    | 0.373    | 0.297    | 3                              |
| PHLDA3      | 0.429                               | 0.267    | 0.466    | 0.488    | 0.233    | 0.331    | 0.207    | 3                              |
| RAC2        | 0.42                                | 0.405    | 0.211    | 0.435    | 0.328    | 0.236    | 0.16     | 3                              |
| ROS1        | 0.485                               | 0.226    | 0.392    | 0.46     | 0.55     | 0.179    | 0.106    | 3                              |
| S100A6      | 0.262                               | 0.14     | 0.455    | 0.515    | 0.523    | 0.347    | 0.219    | 3                              |

Table SI. Continued.

| Gene symbol | Pearson correlation coefficient (r) |          |          |          |          |          |          | No. of datasets with $r > 0.4$ |
|-------------|-------------------------------------|----------|----------|----------|----------|----------|----------|--------------------------------|
|             | TCGA                                | GSE14814 | GSE30219 | GSE37745 | GSE42127 | GSE50081 | GSE68465 |                                |
| SHROOM4     | 0.54                                | -        | 0.406    | 0.377    | 0.605    | 0.248    | -        | 3                              |
| SLC27A1     | 0.431                               | -        | 0.399    | 0.521    | 0.475    | 0.257    | -        | 3                              |
| SNX21       | 0.418                               | -        | 0.393    | 0.455    | 0.208    | 0.405    | -        | 3                              |
| SNX25       | 0.437                               | -        | 0.404    | 0.466    | 0.365    | 0.096    | -        | 3                              |
| SPRED1      | 0.532                               | -        | 0.488    | 0.592    | 0.395    | 0.21     | -        | 3                              |
| TCEAL3      | 0.408                               | -        | 0.465    | 0.319    | 0.44     | 0.228    | -        | 3                              |
| ZBTB46      | 0.399                               | -        | 0.466    | 0.402    | -        | 0.428    | -        | 3                              |
| ZFP36L1     | 0.54                                | -0.096   | 0.572    | 0.377    | 0.297    | 0.448    | 0.222    | 3                              |
| AHR         | 0.414                               | 0.233    | 0.554    | 0.492    | 0.247    | 0.064    | 0.109    | 3                              |
| CTSO        | 0.509                               | 0.178    | 0.417    | 0.47     | 0.235    | 0.188    | 0.223    | 3                              |
| EMB         | 0.512                               | -        | 0.528    | 0.536    | -0.054   | 0.072    | -        | 3                              |
| FAT4        | 0.448                               | 0.058    | 0.453    | 0.442    | 0.143    | 0.217    | 0.145    | 3                              |
| FYN         | 0.407                               | 0.406    | 0.453    | 0.208    | 0.267    | 0.276    | 0.212    | 3                              |
| HOXD1       | 0.476                               | 0.517    | 0.177    | 0.253    | 0.503    | 0.205    | 0.069    | 3                              |
| HPGD        | 0.481                               | 0.196    | 0.206    | 0.401    | 0.422    | 0.213    | 0.266    | 3                              |
| HRCT1       | 0.259                               | -        | 0.405    | 0.445    | -        | 0.458    | -        | 3                              |
| KCNN4       | 0.45                                | 0.248    | 0.403    | 0.534    | 0.219    | 0.176    | 0.171    | 3                              |
| LOC284578   | 0.556                               | -        | 0.519    | 0.441    | -        | 0.173    | -        | 3                              |
| MFSD4       | 0.56                                | -        | 0.457    | 0.516    | 0.089    | 0.237    | -        | 3                              |
| PAPLN       | 0.457                               | -        | 0.293    | 0.406    | 0.284    | 0.436    | -        | 3                              |
| PDLIM4      | 0.528                               | 0.284    | 0.281    | 0.562    | 0.098    | 0.485    | 0.265    | 3                              |
| SGMS2       | 0.431                               | -        | 0.415    | 0.502    | -        | -0.029   | -        | 3                              |
| SMURF2      | 0.474                               | 0.068    | 0.571    | 0.517    | 0.017    | 0.223    | 0.212    | 3                              |
| VIM         | 0.431                               | 0.066    | 0.299    | 0.453    | 0.405    | 0.075    | 0.193    | 3                              |

Table SII. Correlation between CX3CL1 expression and other genes in lung squamous cell carcinoma.

| Gene symbol  | Pearson correlation coefficient (r) |          |          |          |          |          | No. of datasets with $r > 0.4$ |
|--------------|-------------------------------------|----------|----------|----------|----------|----------|--------------------------------|
|              | TCGA                                | GSE50081 | GSE42127 | GSE37745 | GSE30219 | GSE14814 |                                |
| CX3CL1       | 1                                   | 1        | 1        | 1        | 1        | 1        | 6                              |
| CPNE2        | 0.404                               | 0.633    | 0.385    | 0.523    | 0.613    | -        | 4                              |
| PLLP         | 0.389                               | 0.575    | -        | 0.53     | 0.55     | 0.481    | 4                              |
| HEY1         | 0.354                               | 0.518    | 0.139    | 0.433    | 0.333    | 0.576    | 3                              |
| SUN2         | 0.313                               | 0.479    | -        | 0.452    | 0.48     | 0.368    | 3                              |
| NDRG4        | 0.291                               | 0.3      | 0.175    | 0.425    | 0.475    | 0.423    | 3                              |
| COMT         | 0.105                               | 0.569    | 0.25     | 0.45     | 0.352    | 0.337    | 2                              |
| NOL12        | -                                   | 0.518    | -        | 0.372    | 0.35     | 0.499    | 2                              |
| PDLIM1       | 0.259                               | 0.468    | 0.328    | 0.412    | 0.21     | 0.399    | 2                              |
| BAG3         | 0.255                               | 0.5      | 0.387    | 0.299    | 0.081    | 0.408    | 2                              |
| CDC42EP1     | 0.248                               | 0.401    | 0.241    | 0.375    | 0.274    | 0.472    | 2                              |
| CHST7        | 0.283                               | 0.332    | 0.197    | 0.19     | 0.448    | 0.422    | 2                              |
| FBXW4        | 0.212                               | 0.578    | 0.344    | 0.16     | 0.25     | 0.476    | 2                              |
| ITPKB        | 0.224                               | 0.457    | 0.441    | 0.222    | 0.263    | 0.393    | 2                              |
| KIAA1683     | 0.115                               | 0.453    | 0.417    | 0.302    | 0.186    | -        | 2                              |
| LDLR         | 0.216                               | 0.14     | 0.589    | 0.318    | 0.134    | 0.445    | 2                              |
| MYH9         | 0.168                               | 0.155    | 0.4      | 0.447    | 0.134    | 0.458    | 2                              |
| NRSN2        | 0.128                               | 0.471    | -        | 0.319    | 0.524    | 0.02     | 2                              |
| PLXNB2       | 0.26                                | 0.504    | 0.267    | 0.429    | 0.201    | 0.305    | 2                              |
| RAB7B        | -                                   | 0.34     | 0.442    | 0.49     | 0.151    | -        | 2                              |
| SERTAD1      | 0.086                               | 0.327    | 0.524    | 0.434    | -0.237   | -        | 2                              |
| SLC25A1      | 0.062                               | 0.451    | 0.129    | 0.349    | 0.078    | 0.462    | 2                              |
| SOX7         | 0.153                               | 0.349    | 0.46     | 0.417    | 0.072    | -        | 2                              |
| UBTD1        | 0.213                               | 0.336    | 0.416    | 0.462    | 0.117    | -0.042   | 2                              |
| VIPR1        | 0.203                               | 0.402    | 0.402    | 0.377    | 0.259    | 0.099    | 2                              |
| FLYWCH1      | 0.235                               | 0.408    | -0.329   | 0.527    | 0.25     | -        | 2                              |
| ACTN3        | -0.076                              | 0.158    | 0.411    | 0.431    | 0.018    | -0.128   | 2                              |
| AGAP2-AS1    | -                                   | 0.533    | -        | 0.411    | 0.148    | -        | 2                              |
| CCND1        | 0.153                               | 0.405    | 0.51     | 0.086    | 0.164    | 0.097    | 2                              |
| CD9          | 0.228                               | 0.433    | 0.051    | 0.283    | 0.436    | 0.243    | 2                              |
| CTDSPL       | 0.164                               | 0.173    | 0.539    | 0.158    | 0.438    | -0.138   | 2                              |
| CYB5R3       | 0.127                               | 0.54     | 0.102    | 0.136    | 0.097    | 0.516    | 2                              |
| LOC283485    | -                                   | 0.404    | -        | 0.407    | 0.231    | -        | 2                              |
| LRRRC29      | 0.09                                | 0.411    | -0.04    | 0.402    | 0.028    | -        | 2                              |
| PCDHGA1      | -                                   | 0.205    | -        | 0.414    | 0.401    | 0.251    | 2                              |
| PHLDA3       | 0.279                               | 0.555    | 0.198    | 0.525    | 0.179    | 0.064    | 2                              |
| PHLDB1       | 0.063                               | 0.151    | 0.484    | 0.403    | 0.205    | -0.061   | 2                              |
| PIM3         | 0.167                               | 0.439    | -0.112   | 0.425    | 0.206    | -        | 2                              |
| PTPRZ1       | 0.281                               | 0.26     | 0.017    | 0.456    | 0.426    | 0.226    | 2                              |
| RP11-134G8.8 | -                                   | 0.49     | -        | 0.438    | 0.165    | -        | 2                              |
| SEMA4B       | 0.293                               | 0.536    | 0.071    | 0.508    | -0.103   | -        | 2                              |
| SNX17        | 0.055                               | 0.463    | -0.014   | 0.184    | 0.18     | 0.469    | 2                              |
| TNFRSF1A     | 0.188                               | 0.421    | 0.267    | 0.53     | 0.033    | 0.269    | 2                              |
| TRIM56       | 0.193                               | 0.155    | 0.437    | 0.406    | 0.128    | -        | 2                              |
| WTIP         | 0.069                               | 0.423    | 0.44     | 0.155    | -0.021   | -        | 2                              |
| ZNRF1        | 0.15                                | 0.51     | 0.213    | 0.44     | 0.298    | -        | 2                              |
